# Supplementary material for: Fusaricidin Produced by Paenibacillus polymyxa WLY78 Induces Systemic Resistance against Fusarium Wilt of Cucumber
Source: PubMed Central journal article supplement (PMC6829208; doi:10.3390/ijms20205240), 2019-10-22
Supplement: ijms-20-05240-s001.pdf [file ijms-20-05240-s001.pdf]

# Supplementary Materials:

## Fusaricidin Produced by *Paenibacillus polymyxa* WLY78 Induces Systemic Acquired Resistance against Fusarium wilt of Cucumber

### Supplementary Tables

Table S1. Strains and plasmids.

| Strains and Plasmids                               | Description                                                                                                                                                         | Source    |
|----------------------------------------------------|---------------------------------------------------------------------------------------------------------------------------------------------------------------------|-----------|
| <b>Bacterial Strains</b>                           |                                                                                                                                                                     |           |
| <i>Escherichia coli</i> DH5 $\alpha$               | <i>supE44</i> $\Delta$ <i>lacU169</i> ( $\phi$ 80 <i>lacZ</i> $\Delta$ M15) <i>hsdR17 recA1 end A1 gyrA96 thi-1 relA1</i>                                           | Solarbio  |
| <i>Paenibacillus zanthoxyl</i> JH29                | Wild-type                                                                                                                                                           | [1]       |
| <i>Paenibacillus beijngensis</i> 1-18              | Wild-type                                                                                                                                                           | [2]       |
| <i>Paenibacillus sabiniae</i> T27                  | Wild-type                                                                                                                                                           | [3]       |
| <i>Bacillus amyloliquefaciens</i> LJ02             | Wild-type                                                                                                                                                           | [4]       |
| <i>Bacillus subtilis</i> L56                       | Wild-type                                                                                                                                                           | [5]       |
| <b><i>Paenibacillus polymyxa</i></b>               |                                                                                                                                                                     |           |
| WLY78                                              | Wild-type ACCC 03145                                                                                                                                                | ACCC      |
| <i>fusA</i> mutant                                 | Partial regions of <i>fusA</i> deleted from the WLY78 genome                                                                                                        | This work |
| <i>pabB</i> mutant                                 | Partial region of <i>pabB</i> deleted from the WLY78 genome                                                                                                         | This work |
| <i>pmxA1</i> mutant                                | Partial region of <i>pmxA1</i> deleted from the WLY78 genome                                                                                                        | This work |
| <i>pbtC</i> mutant                                 | Partial region of <i>pbtC</i> deleted from the WLY78 genome                                                                                                         | This work |
| <i>triE</i> mutant                                 | Partial region of <i>triE</i> deleted from the WLY78 genome                                                                                                         | This work |
| <i>dhbE</i> mutant                                 | Partial region of <i>dhbE</i> deleted from the WLY78 genome                                                                                                         | This work |
| <i>padeC</i> mutant                                | Partial region of <i>padeC</i> deleted from the WLY78 genome                                                                                                        | This work |
| <i>paenC</i> mutant                                | Partial region of <i>paenC</i> deleted from the WLY78 genome                                                                                                        | This work |
| <b>Fungi</b>                                       |                                                                                                                                                                     |           |
| <i>Fusarium oxysporum</i> f. sp. <i>cucumerium</i> | ACCC 30220                                                                                                                                                          | ACCC      |
| <i>Fusarium asiaticum</i>                          | ACCC 39255                                                                                                                                                          | ACCC      |
| <i>Fusarium moniliforme</i>                        | ACCC 30133                                                                                                                                                          | ACCC      |
| <i>Verticillium albo-atrum</i>                     | ACCC 30053                                                                                                                                                          | ACCC      |
| <i>Fusarium graminearum</i>                        | ACCC 31053                                                                                                                                                          | ACCC      |
| <i>Monilia persoon</i>                             | ACCC 37407                                                                                                                                                          | ACCC      |
| <i>Alternaria mali</i>                             | ACCC 30003                                                                                                                                                          | ACCC      |
| <i>Botrytis cinerea</i>                            | ACCC 30387                                                                                                                                                          | ACCC      |
| <i>Aspergillus niger</i>                           | ACCC 30005                                                                                                                                                          | ACCC      |
| <b>Plasmids</b>                                    |                                                                                                                                                                     |           |
| pRN5101                                            | A temperature-sensitive shuttle vector containing the <i>ori</i> (Ts) and <i>erm</i> of pE194ts and the <i>oriEc</i> , <i>amp</i> and multicloning region of pBR322 | [6,7]     |
| pHY300PLK                                          | Multiple-copy <i>E. coli</i> - <i>Bacillus</i> shuttle vector, <i>Tet</i> <sup>R</sup>                                                                              | TaKaRa    |
| pRN5101-TFfusA                                     | pRN5101 ligated with two flanking homologous fragments of core fusaricidin synthesis gene                                                                           | This work |
| pRN5101-TFpabB                                     | pRN5101 ligated with two flanking homologous fragments of core paenicidin synthesis gene                                                                            | This work |
| pRN5101-TFpmxA1                                    | pRN5101 ligated with two flanking homologous fragments of core polymyxin synthesis gene                                                                             | This work |
| pRN5101-TFpbtC                                     | pRN5101 ligated with two flanking homologous fragments of core paenibacterin synthesis gene                                                                         | This work |
| pRN5101-TFtriE                                     | pRN5101 ligated with two flanking homologous fragments of core tridecaptin synthesis gene                                                                           | This work |
| pRN5101-TFdhbE                                     | pRN5101 ligated with two flanking homologous fragments of core bacillibactin synthesis gene                                                                         | This work |
| pRN5101-TFpadeC                                    | pRN5101 ligated with two flanking homologous fragments of core paeninodin synthesis gene                                                                            | This work |
| pRN5101-TFpaenC                                    | pRN5101 ligated with two flanking homologous fragments of core paenibacillin synthesis gene                                                                         | This work |
| pRN5101-TFfusB                                     | pRN5101 ligated with two flanking homologous fragments of <i>fusB</i>                                                                                               | This work |

|                 |                                                                        |           |
|-----------------|------------------------------------------------------------------------|-----------|
| pRN5101-TFfusC  | pRN5101 ligated with two flanking homologous fragments of <i>fusC</i>  | This work |
| pRN5101-TFfusD  | pRN5101 ligated with two flanking homologous fragments of <i>fusD</i>  | This work |
| pRN5101-TFfusE  | pRN5101 ligated with two flanking homologous fragments of <i>fusE</i>  | This work |
| pRN5101-TFfusF  | pRN5101 ligated with two flanking homologous fragments of <i>fusF</i>  | This work |
| pRN5101-TFfusG  | pRN5101 ligated with two flanking homologous fragments of <i>fusG</i>  | This work |
| pRN5101-TFfusTE | pRN5101 ligated with two flanking homologous fragments of <i>fusTE</i> | This work |

**Table S2.** Primers for amplification of the homologous arms flanking the region of deletion in core genes.

| PCR Product                                                       | Primer  | Oligonucleotide Sequences (5'-3')               |
|-------------------------------------------------------------------|---------|-------------------------------------------------|
| 5' homologous arm flanking the region of deletion in <i>fusA</i>  | fusAUf  | ACGATGCGTCCGGCGTAGAGCATCCGCGGAACGACCA           |
|                                                                   | fusAUr  | TTCAGGATCTGATTCCGACGCCAAGCTATTATTGG             |
| 3' homologous arm flanking the region of deletion in <i>fusA</i>  | fusADf  | CGTCGGAATCAGATCCTGAATTAAGTATTG                  |
|                                                                   | fusADr  | GCGACCACACCCGTCCTGTGATGAATGACATGCAGTTATATG      |
| 5' homologous arm flanking the region of deletion in <i>pabB</i>  | pabBUf  | ACGATGCGTCCGGCGTAGAGTCCCTACATACATGATCTTATAG     |
|                                                                   | pabBUr  | GGAAGTACATCCATTCCCATTAACCTC                     |
| 3' homologous arm flanking the region of deletion in <i>pabB</i>  | pabBDf  | TGGGAATGGATGTCAGTTCAAAAAGAATG                   |
|                                                                   | pabBDr  | GCGACCACACCCGTCCTGTGGGAGTATATAATTATATTGCTCTACTG |
| 5' homologous arm flanking the region of deletion in <i>pmxA1</i> | pmxA1Uf | ACGATGCGTCCGGCGTAGAGTGGGAAGACCAATTTAAC          |
|                                                                   | pmxA1Ur | AAGCGCACAGTATAATCGTCGCTACCGAATTTTTT             |
| 3' homologous arm flanking the region of deletion in <i>pmxA1</i> | pmxA1Df | GACGATTATACTGTGCGCTTACCTGGTC                    |
|                                                                   | pmxA1Dr | GCGACCACACCCGTCCTGTGCGGGCTTTGCGCGTAAGC          |
| 5' homologous arm flanking the region of deletion in <i>pbtC</i>  | pbtCUf  | ACGATGCGTCCGGCGTAGAGATAGGCGCTTCATACTCTATTTC     |
|                                                                   | pbtCUr  | TTATGGATAACAGTTTGATTTTAACGAAAATGATG             |
| 3' homologous arm flanking the region of deletion in <i>pbtC</i>  | pbtCDf  | AATCAAACCTGTTATCCATAAAGTCTCGTCCC                |
|                                                                   | pbtCDr  | GCGACCACACCCGTCCTGTGAATACTAAAGTAGTTAATGCCTAC    |
| 5' homologous arm flanking the region of deletion in <i>triE</i>  | triEUf  | ACGATGCGTCCGGCGTAGAGTCCCTCCGTTGCGGCAA           |
|                                                                   | triEUr  | CCTTTTTACCCTTATGGTAGAACATCGCAATGTCGTGC          |
| 3' homologous arm flanking the region of deletion in <i>triE</i>  | triEDf  | CTACCATAACGGTAAAAAGGAAATCGCATATTCATGCGGTTTG     |
|                                                                   | triEDr  | GCGACCACACCCGTCCTGTGTGGAGCTAGGGGCGGCTG          |
| 5' homologous arm flanking the region of deletion in <i>dhbE</i>  | dhbEUf  | ACGATGCGTCCGGCGTAGAGCTCCACGAACGTCACCCTTG        |
|                                                                   | dhbEUr  | GAGGAATATCCGAAGACAGATACTCGTAATGAAAATG           |
| 3' homologous arm flanking the region of deletion in <i>dhbE</i>  | dhbEDf  | CTGTCTTGGGATATTCCTCTCTTTCTGTATCGTTC             |
|                                                                   | dhbEDr  | GCGACCACACCCGTCCTGTGCGAAGTGGCACTCCGAGAATG       |
| 5' homologous arm flanking the region of deletion in <i>padeC</i> | padeCUf | ACGATGCGTCCGGCGTAGAGAGTTAGGGACTGTATGTG          |
|                                                                   | padeCUr | TCTATAGCTTTTGAATCTGTTCCGGTCAG                   |
| 3' homologous arm flanking the region of deletion in <i>padeC</i> | padeCDf | ACAGATTCGAAAGCTATAGATTCCGGCAATC                 |
|                                                                   | padeCDr | GCGACCACACCCGTCCTGTGGCTTATCGACAAAATCCCC         |
| 5' homologous arm flanking the region of deletion in <i>paenC</i> | paenCUf | ACGATGCGTCCGGCGTAGAGAACTGTAGTAGCACAGG           |
|                                                                   | paenCUr | TACATGTACCCATCGAAAGCTTTTGCAC                    |
| 3' homologous arm flanking the region of deletion in <i>paenC</i> | paenCDf | GCTTTCGATGGGTACATGTAATTTTCCGAG                  |
|                                                                   | paenCDr | GCGACCACACCCGTCCTGTGCATTATGGAGATTGCATGATAAAAC   |

**Table S3.** Primers for amplification of the homologous arms flanking the genes within the *fus* cluster.

| PCR Product            | Primer | Oligonucleotide Sequences (5'-3')          |
|------------------------|--------|--------------------------------------------|
| <i>fusB</i> upstream   | fusBUf | ACGATGCGTCCGGCGTAGAGCGACGTATGTTCTGGCAGCAG  |
|                        | fusBUr | GAATAAGCCTCGGTGTGGAAGCGCACGT               |
| <i>fusB</i> downstream | fusBDf | TTCCACACCGAGGCTTATCCCTTCCCAC               |
|                        | fusBDr | GCGACCACACCCGTCCTGTGGCAGGCGGTGGAGCAATC     |
| <i>fusC</i> upstream   | fusCUf | ACGATGCGTCCGGCGTAGAGCGGCTCATTTCCTGAATTAAGT |
|                        | fusCUr | CGTGGATACAGCCTGTGAGCGAAGAGCTAATC           |
| <i>fusC</i> downstream | fusCDf | GCTCACAGGCTGTATCCACGTCCTTCGTTG             |
|                        | fusCDr | GCGACCACACCCGTCCTGTGGAAGAACACGAACCTTTCTGC  |
| <i>fusD</i> upstream   | fusDUf | ACGATGCGTCCGGCGTAGAGAACGGGGGATGCTCCC       |
|                        | fusDUr | TTTGGTATGAGAAGGACGTGGATACAGTGAGAAGACG      |
| <i>fusD</i> downstream | fusDDf | CACGTCCTTCTCATACCAAACCTCTCTTTTC            |
|                        | fusDDr | GCGACCACACCCGTCCTGTGTATGGCTGTATTTCATGCC    |
| <i>fusE</i> upstream   | fusEUf | ACGATGCGTCCGGCGTAGAGGCCGATCATGCCATTGCTC    |
|                        | fusEUr | AGAATGTGCCATGACTGCGAGCTTTTTTCC             |
| <i>fusE</i> downstream | fusEDf | TCGAGTCATGGCACATTCTCCCTTCC                 |

|                         |         |                                               |
|-------------------------|---------|-----------------------------------------------|
|                         | fusEDr  | GCGACCACACCCGTCCTGTGCGCCATGAACTACCTACC        |
| <i>fusF</i> upstream    | fusFUf  | ACGATGCGTCCGGCGTAGAGCTGGAGGAGATACGCTTG        |
|                         | fusFUr  | AGGGAACGTTCAAGATATTTACCAAAACCGC               |
| <i>fusF</i> downstream  | fusFDf  | AAATATCTTGAACGTTCCCTCCTTACATC                 |
|                         | fusFDr  | GCGACCACACCCGTCCTGTGAAGCAACACAATTATTTTTGTG    |
| <i>fusG</i> upstream    | fusGUf  | ACGATGCGTCCGGCGTAGAGCGACACCGTCCGCTGCT         |
|                         | fusGUr  | AAAGGTGGTTTCTGGAGGGAACGTTGTGCTTATTAC          |
| <i>fusG</i> downstream  | fusGDf  | CGTTCCTCCAGAAACCACCTTTCTTTTTTACATTATTAAC      |
|                         | fusGDr  | GCGACCACACCCGTCCTGTGGCGGTGTTATCACGGTG         |
| <i>fusTE</i> upstream   | fusTEUf | ACGATGCGTCCGGCGTAGAGCATTGCGGAAGATCCCTAC       |
|                         | fusTEUr | TATAAAGTCTAGAAAATCTACTCCTCTATATAGCTATAATTAATC |
| <i>fusTE</i> downstream | fusTEDf | AGATTTTCTAGGACTTTATATGTTAAGGACAG              |
|                         | fusTEDr | GCGACCACACCCGTCCTGTGCCATTCCCTGAAAGTATTG       |

**Table S4.** Primers for RT-PCR analysis.

| PCR Product         | Primer | Oligonucleotide Sequences (5'-3') |
|---------------------|--------|-----------------------------------|
| 0 intergenic spacer | 0f     | GAGTTGTGCCCTTCAGCAG               |
|                     | 0r     | GCGGTGTTTCATCACGGTGA              |
| 1 intergenic spacer | 1f     | GTCGAGGGCTTCGAGCTTTG              |
|                     | 1r     | GAGCTTGATGCATTGGCGG               |
| 2 intergenic spacer | 2f     | CACCACAATATCAGCTGGC               |
|                     | 2r     | GTAGGCGAAGTGTGGATACG              |
| 3 intergenic spacer | 3f     | CAAGCGGCTTCACAAGTGAG              |
|                     | 3r     | GTTCAACTCTGGACAGGAC               |
| 4 intergenic spacer | 4f     | CAGTGACCGGTCCAATTC                |
|                     | 4r     | CTTGGGAAGAAACGGCTACG              |
| 5 intergenic spacer | 5f     | GTACCGGTGAGGAAGCACATC             |
|                     | 5r     | GGGTATTGTCGGCTCTGG                |
| 6 intergenic spacer | 6f     | GACTTCCAACCCGTAAGC                |
|                     | 6r     | GTTGATTGTGGAGTCGCTTGC             |
| 7 intergenic spacer | 7f     | CCTAAGGTCAATCCCTCCCC              |
|                     | 7r     | GATTGTCGAGACGGTGCTGG              |
| 8 intergenic spacer | 8f     | GTTGCTCCGTCAGGCTTTCCG             |
|                     | 8r     | CGTCCATGTTTCGCTTTCCG              |

**Table S5.** Primers for qRT-PCR analysis.

| Gene                          | Forward Primer (5'-3')  | Reverse Primer (5'-3')  | Reference |
|-------------------------------|-------------------------|-------------------------|-----------|
| <i>NPR1</i>                   | TTACTGATAAGGGCAAGAAGGCC | AAAGTTCACAAAGAGCAGGATGG | [8]       |
| <i>PR1</i>                    | TGCTCAACAATATGCGAACC    | TCATCCACCCACAACCTGAAC   | [9]       |
| <i>PR2</i>                    | GGTGACCGTCAGCGGG        | TTCCAACATTACAAGCTCTAAGA | [10]      |
| <i>PR3</i>                    | GCCTTACTCCATAACATCACTCC | GATTTGATATCGAGTCTGGCT   | [10]      |
| <i>ETR1</i>                   | GCCATGTTGCAAAAGCAGA     | GCCAAAGACCACTGCCACA     | [11]      |
| <i>EF1<math>\alpha</math></i> | ACTGTGCTGTCTCATTATTG    | AGGGTGAAAGCAAGAAGAGC    | [12]      |

**Table S6.** Physiological and biochemical characteristics of *P. polymyxa* WLY78 and *fusA* mutant.

| Physiological and Biochemical Index | WLY78   | <i>fusA</i> Mutant |
|-------------------------------------|---------|--------------------|
| Catalase activity                   | +       | +                  |
| Nitrate reduction                   | +       | +                  |
| H <sub>2</sub> S produced           | -       | -                  |
| <i>V. Paenibacillus</i> Test        | +       | +                  |
| Growth in NaCl range at (% w/v)     | 0-4%    | 0-4%               |
| Indole production                   | -       | -                  |
| Egg yolk reaction                   | -       | -                  |
| Anaerobic growth                    | -       | -                  |
| Oxidase activity                    | -       | -                  |
| Temperature for growth range        | 15-42°C | 15-42°C            |
| Motility                            | +       | +                  |
| <b>Hydrolysis of</b>                |         |                    |
| Gelatin                             | +       | +                  |
| Aesculin                            | +       | +                  |

|                                          |   |   |
|------------------------------------------|---|---|
| Casein                                   | + | + |
| Tyrosine                                 | - | - |
| Urea                                     | - | - |
| Cellulose                                | + | + |
| Tween 20                                 | - | - |
| Tween 80                                 | - | - |
| <b>Utilization of sole carbon source</b> |   |   |
| Starch                                   | + | + |
| Inositol                                 | - | - |
| l-Arabinose                              | + | + |
| d-Trehalose                              | + | + |
| Glycerol                                 | + | + |
| Ascorbic acid                            | + | + |
| Proline                                  | + | + |
| Cystine                                  | - | - |
| Threonine                                | - | - |
| Valine                                   | - | - |
| Arginine                                 | + | + |
| Citric acid                              | - | - |
| Sucrose                                  | + | + |
| Xylose                                   | + | + |
| Maltose                                  | + | + |
| Tyrosine                                 | - | - |
| Mannitol                                 | + | + |
| Glucose                                  | + | + |
| Sorbitol                                 | + | + |
| Fructose                                 | + | + |
| Oxalate                                  | - | - |
| Galactose                                | + | + |
| Ribose                                   | + | + |
| Glycogen                                 | + | + |
| Rhamnose                                 | - | - |
| Lysine                                   | + | + |

“+” means positive; “-” means negative.

**Table S7.** Summary of genes from the paenicidin B biosynthetic gene cluster.

| Gene        | Length (bp) | Highest BLAST Hit (% Identity) | Predicted Product                      |
|-------------|-------------|--------------------------------|----------------------------------------|
| <i>pabA</i> | 174         | AHF21230.1 (69)                | Paenicidin B prepropeptide             |
| <i>pabF</i> | 729         | AHF21231.1 (89)                | ABC transporter ATP binding protein    |
| <i>pabE</i> | 795         | AHF21232.1 (67)                | ABC transporter membrane-bound subunit |
| <i>pabG</i> | 768         | AHF21233.1 (78)                | ABC transporter membrane-bound subunit |
| <i>pabB</i> | 3180        | AHF21234.1 (76)                | Lantibiotic dehydratase                |
| <i>pabT</i> | 1884        | AHF21235.1 (87)                | Lantibiotic ABC transporter            |
| <i>pabC</i> | 1383        | AHF21236.1 (80)                | Lantibiotic cyclase                    |

**Table S8.** Summary of genes from the polymyxin biosynthetic gene cluster.

| Gene         | Length (bp) | Highest BLAST Hit (% Identity) | Predicted Product        |
|--------------|-------------|--------------------------------|--------------------------|
| <i>pmxA1</i> | 13473       | ACA97576.1 (95)                | Polymyxin synthetase     |
| <i>pmxA2</i> | 5115        | ACA97576.1 (96)                | Polymyxin synthetase     |
| <i>pmxB</i>  | 3309        | ACA97577.1 (96)                | Polymyxin synthetase     |
| <i>pmxC</i>  | 1827        | ACA97578.1 (98)                | Transporter-like protein |
| <i>pmxD</i>  | 1734        | ACA97579.1 (99)                | Transporter-like protein |
| <i>pmxE</i>  | 18768       | ACA97580.1 (96)                | Polymyxin synthetase     |

**Table S9.** Summary of genes from the paenibacterin biosynthetic gene cluster

| Gene        | Length (bp) | Highest BLAST Hit (% Identity) | Predicted Product                                                  |
|-------------|-------------|--------------------------------|--------------------------------------------------------------------|
| <i>orf1</i> | 723         | AJE53773.1 (100)               | Thioesterase                                                       |
| <i>pbtA</i> | 10110       | AGM16413.1 (46)                | Paenibacterin synthetase B                                         |
| <i>pbtC</i> | 17319       | AGM16414.1 (47)                | Paenibacterin synthetase C                                         |
| <i>orf4</i> | 8640        | WP_049816874.1 (100)           | Hybrid non-ribosomal peptide synthetase/type I polyketide synthase |
| <i>plpA</i> | 867         | AFJ14790.1 (64)                | Diaminobutyrate-2-oxoglutarate aminotransferase                    |

**Table S10.** Summary of genes from the tridecaptin biosynthetic gene cluster

| Gene         | Length (bp) | Highest BLAST Hit (% Identity) | Predicted Product                               |
|--------------|-------------|--------------------------------|-------------------------------------------------|
| <i>triE</i>  | 11220       | AHF21229.1 (91)                | Tridecaptin non-ribosomal peptide synthetase    |
| <i>triD3</i> | 17490       | AHF21228.1 (92)                | Tridecaptin non-ribosomal peptide synthetase    |
| <i>triD2</i> | 2940        | AHF21228.1 (91)                | Tridecaptin non-ribosomal peptide synthetase    |
| <i>triD1</i> | 28113       | AHF21228.1 (88)                | Tridecaptin non-ribosomal peptide synthetase    |
| <i>triC</i>  | 1875        | AHF21227.1 (89)                | Diaminobutyrate-2-oxoglutarate aminotransferase |
| <i>TriB</i>  | 1896        | AHF21226.1 (87)                | ABC transporter                                 |
| <i>TriA</i>  | 825         | AHF21225.1 (86)                | Thioesterase                                    |

**Table S11.** Summary of genes from the bacillibactin biosynthetic gene cluster

| Gene         | Length (bp) | Highest BLAST Hit (% Identity) | Predicted Product                                |
|--------------|-------------|--------------------------------|--------------------------------------------------|
| <i>mbtH</i>  | 219         | CAX52685.1 (65)                | Stimulator of DhbF tyrosine adenylation activity |
| <i>dhbF2</i> | 2547        | ABS75232.1 (98)                | Amino acid adenylation domain-containing protein |
| <i>dhbF1</i> | 4899        | ABS75232.1 (54)                | Amino acid adenylation domain-containing protein |
| <i>dhbB</i>  | 1053        | ABS75233.1 (60)                | Isochorismatase                                  |
| <i>dhbE</i>  | 1656        | ABS75234.1 (70)                | Adenylate synthase                               |
| <i>dhbC</i>  | 1287        | ABS75235.1 (52)                | Isochorismate synthase                           |
| <i>dhbA</i>  | 786         | ABS75236.1 (62)                | 2,3-Dihydro-2,3-dihydroxybenzoate Dehydrogenase  |

**Table S12.** Summary of genes from the paeninodin biosynthetic gene cluster

| Gene          | Length (bp) | Highest BLAST Hit (% Identity) | Predicted Product                                |
|---------------|-------------|--------------------------------|--------------------------------------------------|
| <i>orf1</i>   | 1494        | WP_069011102.1 (99)            | Nucleotidyltransferase family protein            |
| <i>padeB2</i> | 486         | WP_029516230.1 (100)           | Lasso peptide biosynthesis B2                    |
| <i>orf2</i>   | 303         | WP_029516229.1 (100)           | Lasso peptide biosynthesis PqqD family chaperone |
| <i>orf3</i>   | 1044        | WP_029516228.1 (99)            | Serine kinase                                    |
| <i>orf4</i>   | 129         | WP_134902123.1 (100)           | Paeninodin family lasso peptide                  |
| <i>padeC</i>  | 1926        | WP_029516227.1 (99)            | Asparagine synthetase B                          |

**Table S13.** Summary of genes from the paenibacillin biosynthetic gene cluster

| Gene         | Length (bp) | Highest BLAST Hit (% Identity) | Predicted Product                |
|--------------|-------------|--------------------------------|----------------------------------|
| <i>paenN</i> | 759         | AFS60110.1 (98)                | Putative acetylase               |
| <i>agrC</i>  | 780         | AFS60109.1 (98)                | Response regulator               |
| <i>agrA</i>  | 1329        | AFS60108.1 (100)               | Histidine kinase                 |
| <i>agrD</i>  | 165         | AFS60107.1 (100)               | Auto-inducing peptide            |
| <i>agrB</i>  | 591         | AFS60106.1 (97)                | Accessory gene regulator B       |
| <i>paenT</i> | 1782        | AFS60105.1 (99)                | ATP-binding cassette transporter |
| <i>paenI</i> | 558         | AFS60104.1 (100)               | Putative immunity protein        |
| <i>paenC</i> | 1272        | AFS60103.1 (99)                | Lantibiotic cyclase              |
| <i>paenB</i> | 3084        | AFS60102.1 (99)                | Lantibiotic dehydratase          |
| <i>paenP</i> | 942         | AFS60101.1 (100)               | Peptidase                        |
| <i>paenA</i> | 162         | AFS60100.1 (100)               | Paenibacillin prepropeptide      |

## Supplementary Figures

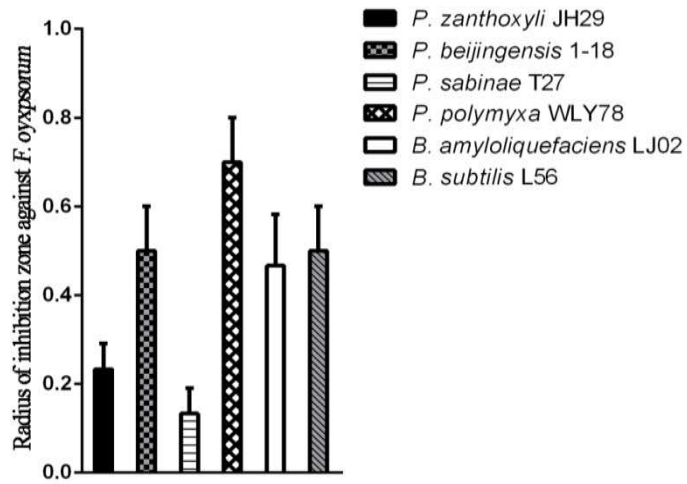

**Figure 1.** *P. polymyxa* WLY78 exhibits excellent antifungal activity against *F. oxysporum*. The results shown are the means  $\pm$  standard deviation of a representative experiment that was repeated three times.

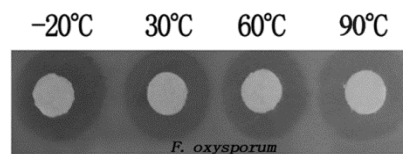

**Figure 2.** Methanol extracts from *P. polymyxa* WLY78 cells exhibits heat-stable antifungal activity against *F. oxysporum*.

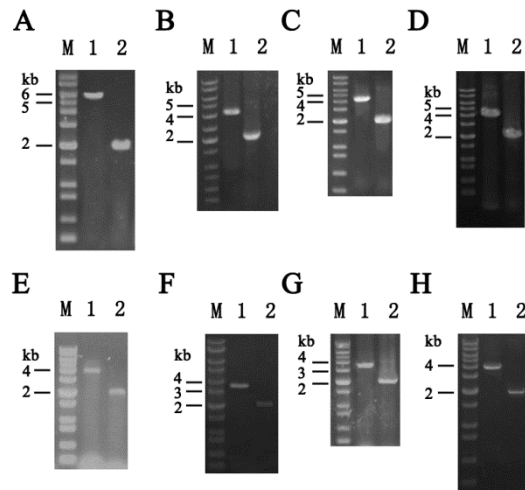

**Figure 3.** Agarose gel electrophoresis analysis of the disruption of genes *fusA* (A), *pabB* (B), *pmxA1* (C), *pbtC* (D), *triE* (E), *dhbE* (F), *padeC* (G) and *paenC* (H) in *P. polymyxa* WLY78. M indicates 1 kb plus DNA marker. Lane 1 indicates PCR fragments amplified by primers *fusAUf/fusADr* using wild-type WLY78 DNA as template and lane 2 indicates PCR fragments amplified by primers *fusAUf/fusADr* using *fusA*<sup>-</sup> mutant DNA as template. Compared with that amplified from wild-type WLY78, amplicon from *fusA*<sup>-</sup> mutant was ~3.7 kb smaller, confirming deletion of partial *fusA* gene (A). Lane 1 indicates PCR fragments amplified by primers *pabBUf/pabBDr* using wild-type WLY78 DNA as template and lane 2 indicates PCR fragments amplified by primers *pabBUf/pabBDr* using *pabB*<sup>-</sup> mutant DNA as template. Compared with that amplified from wild-type WLY78, amplicon from *pabB*<sup>-</sup> mutant was ~2 kb smaller, confirming deletion of partial *pabB* gene (B). Lane 1 indicates PCR fragments amplified by primers *pmxA1Uf/pmxA1Dr* using wild-type WLY78 DNA as template and lane 2 indicates PCR fragments amplified by primers *pmxA1Uf/pmxA1Dr* using *pmxA1*<sup>-</sup> mutant DNA as template. Compared with that amplified from wild-type WLY78, amplicon from *pmxA1*<sup>-</sup> mutant was 2 kb smaller, confirming deletion of partial *pmxA1* gene (C). Lane 1 indicates PCR fragments amplified by primers *pbtCUf/pbtCDr* using wild-type WLY78 DNA as template and lane 2 indicates PCR fragments amplified by primers *pbtCUf/pbtCDr* using *pbtC*<sup>-</sup> mutant DNA as template. Compared with that amplified from wild-type WLY78, amplicon from *pbtC*<sup>-</sup> mutant was ~2 kb smaller, confirming deletion of partial *pbtC* gene (D). Lane 1 indicates PCR fragments amplified by primers *triEUf/triEDr* using wild-type WLY78 DNA as template and lane 2 indicates PCR fragments amplified by primers *triEUf/triEDr* using *triE*<sup>-</sup> mutant DNA as template. Compared with that amplified from wild-type WLY78, amplicon from *triE*<sup>-</sup> mutant was ~2 kb smaller, confirming deletion of partial *triE* gene (E). Lane 1 indicates PCR fragments amplified by primers *dhbEUf/dhbEDr* using wild-type WLY78 DNA as template and lane 2 indicates PCR fragments amplified by primers *dhbEUf/dhbEDr* using *dhbE*<sup>-</sup> mutant DNA as template. Compared with that amplified from wild-type WLY78, amplicon from *dhbE*<sup>-</sup> mutant was ~1.6 kb smaller, confirming deletion of partial *dhbE* gene (F). Lane 1 indicates PCR fragments amplified by primers *padeCUf/padeCDr* using wild-type WLY78 DNA as template and lane 2 indicates PCR fragments amplified by primers *padeCUf/padeCDr* using *padeC*<sup>-</sup> mutant DNA as template. Compared with that amplified from wild-type WLY78, amplicon from *padeC*<sup>-</sup> mutant was ~1.9 kb smaller, confirming deletion of partial *padeC* gene (G). Lane 1 indicates PCR fragments amplified by primers *paenCUf/paenCDr* using wild-type WLY78 DNA as template and lane 2 indicates PCR fragments amplified by primers *paenCUf/paenCDr* using *paenC*<sup>-</sup> mutant DNA as template. Compared with that amplified from wild-type WLY78, amplicon from *paenC*<sup>-</sup> mutant was ~2 kb smaller, confirming deletion of partial *paenC* gene (H).

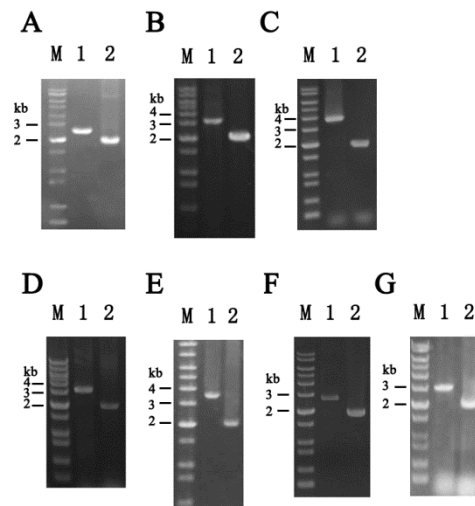

**Figure 4.** Agarose gel electrophoresis analysis of the deletion of genes *fusB* (A), *fusC* (B), *fusD* (C), *fusE* (D), *fusF* (E), *fusG* (F) and *fusTE* (G) in *P. polymyxa* WLY78. M indicates 1 kb plus DNA marker. Lane 1 indicates PCR fragments amplified by primers fusBUf/fusBDr using wild-type WLY78 DNA as template and lane 2 indicates PCR fragments amplified by primers fusBUf/fusBDr using  $\Delta$ *fusB* mutant DNA as template. Compared with that amplified from wild-type WLY78, amplicon from  $\Delta$ *fusB* mutant was ~0.4 kb smaller, confirming deletion of *fusB* gene (A). Lane 1 indicates PCR fragments amplified by primers fusCUf/fusCDr using wild-type WLY78 DNA as template and lane 2 indicates PCR fragments amplified by primers fusCUf/fusCDr using  $\Delta$ *fusC* mutant DNA as template. Compared with that amplified from wild-type WLY78, amplicon from  $\Delta$ *fusC* mutant was ~1.2 kb smaller, confirming deletion of *fusC* gene (B). Lane 1 indicates PCR fragments amplified by primers fusDUf/fusDDr using wild-type WLY78 DNA as template and lane 2 indicates PCR fragments amplified by primers fusDUf/fusDDr using  $\Delta$ *fusD* mutant DNA as template. Compared with that amplified from wild-type WLY78, amplicon from  $\Delta$ *fusD* mutant was ~1.7 kb smaller, confirming deletion of *fusD* gene (C). Lane 1 indicates PCR fragments amplified by primers fusEUf/fusEDr using wild-type WLY78 DNA as template and lane 2 indicates PCR fragments amplified by primers fusEUf/fusEDr using  $\Delta$ *fusE* mutant DNA as template. Compared with that amplified from wild-type WLY78, amplicon from  $\Delta$ *fusE* mutant was ~1.2 kb smaller, confirming deletion of *fusE* gene (D). Lane 1 indicates PCR fragments amplified by primers fusFUf/fusFDr using wild-type WLY78 DNA as template and lane 2 indicates PCR fragments amplified by primers fusFUf/fusFDr using  $\Delta$ *fusF* mutant DNA as template. Compared with that amplified from wild-type WLY78, amplicon from  $\Delta$ *fusF* mutant was ~1.4 kb smaller, confirming deletion of *fusF* gene (E). Lane 1 indicates PCR fragments amplified by primers fusGUf/fusGDr using wild-type WLY78 DNA as template and lane 2 indicates PCR fragments amplified by primers fusGUf/fusGDr using  $\Delta$ *fusG* mutant DNA as template. Compared with that amplified from wild-type WLY78, amplicon from  $\Delta$ *fusG* mutant was ~0.7 kb smaller, confirming deletion of *fusG* gene (F). Lane 1 indicates PCR fragments amplified by primers fusTEUf/fusTEDr using wild-type WLY78 DNA as template and lane 2 indicates PCR fragments amplified by primers fusTEUf/fusTEDr using  $\Delta$ *fusTE* mutant DNA as template. Compared with that amplified from wild-type WLY78, amplicon from  $\Delta$ *fusTE* mutant was ~1 kb smaller, confirming deletion of *fusTE* gene (G).



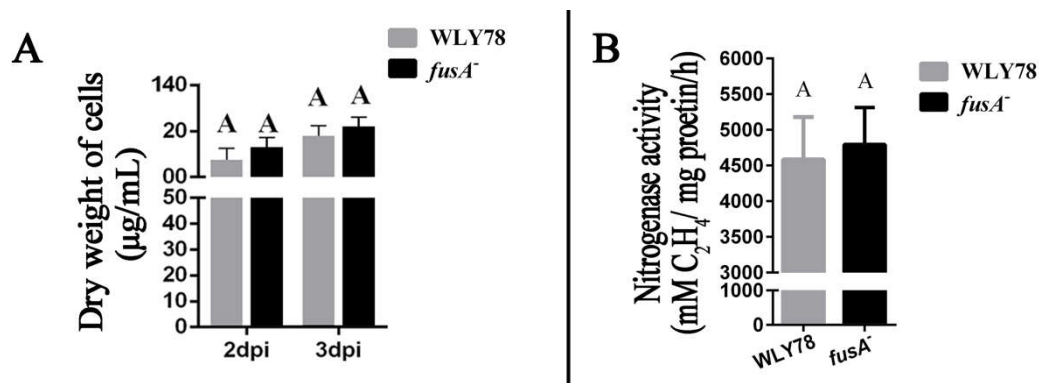

**Figure 5.** Dry weight of *P. polymyxa* WLY78 and the *fusA* mutant cells collected from the KL broth (A). The nitrogenase activities of *P. polymyxa* WLY78 and the *fusA* mutant under nitrogen-limited conditions (B). Error bars indicate standard deviation among triplicates. Different letters indicate significant difference at  $P < 0.01$  according to Duncan multiple range test.

### Supplementary Reference

1. Ma, Y. C.; Zhang, J.; Chen, S. F., *Paenibacillus zanthoxyl* sp. nov., a novel nitrogen-fixing species isolated from the rhizosphere of *Zanthoxylum simulans*. *Int. J. Syst. Evol. Microbiol.* **2007**, *57*, (4), 873-877.
2. Gao, M.; Xie, L. Q.; Wang, Y. X.; Chen, J.; Xu, J.; Zhang, X.; Sui, X. H.; Gao, J. L.; Sun, J. G., *Paenibacillus beijingensis* sp. nov., a novel nitrogen-fixing species isolated from jujube garden soil. *Antonie Van Leeuwenhoek* **2012**, *102*, (4), 689-694.
3. Hong, Y.; Ma, Y.; Wu, L.; Maki, M.; Qin, W.; Chen, S., Characterization and analysis of *nifH* genes from *Paenibacillus sabiniae* T27. *Microbiol. Res.* **2012**, *167*, (10), 596-601.
4. Li, Y.; Gu, Y.; Li, J.; Xu, M.; Wei, Q.; Wang, Y., Biocontrol agent *Bacillus amyloliquefaciens* LJ02 induces systemic resistance against cucurbits powdery mildew. *Front. Microbiol.* **2015**, *6*, 883.
5. Li, Y. B.; Shi, H. W.; Zhang, H. W.; Chen, S. F., Amerlioration of drought effects in wheat and cucumber by combined application of super absorbent polymer and poential biofertilizer. *PeerJ* **2018**, *7*, e6073.
6. Villafane, R.; Bechhofer, D. H.; Narayanan, C. S.; Dubnau, D., Replication control genes of plasmid pE194. *J. Bacteriol.* **1987**, *169*, (10), 4822-4829.
7. Lereclus, D.; Vallade, M.; Chaufaux, J.; Arantes, O.; Rambaud, S., Expansion of insecticidal host range of *Bacillus thuringiensis* by in vivo genetic recombination. *Bio/technology* **1992**, *10*, (4), 418-421.
8. Xiaoming Pu; Bingyan Xie; Peiqian Li; Zhenchuan Mao; Jian Ling; Huifang Shen; Jingxin Zhang; Ning Huang; Lin, B., Analysis of the defence-related mechanism in cucumber seedlings in relation to root colonization by nonpathogenic *Fusarium oxysporum* CS-20. *FEMS Microbiol. Lett.* **2014**, *355*, (2), 142-151.
9. Alizadeh, H.; Behboudi, K.; Ahmadzadeh, M.; Javan-Nikkhah, M.; Zamioudis, C.; Pieterse, C. M. J.; Bakker, P. A. H. M., Induced systemic resistance in cucumber and *Arabidopsis thaliana* by the combination of *Trichoderma harzianum* Tr6 and *Pseudomonas* sp. Ps14. *Biol. Control* **2013**, *65*, (1), 14-23.
10. Sang, M. K.; Kim, K. D., Biocontrol activity and primed systemic resistance by compost water extracts against anthracnoses of pepper and cucumber. *Phytopathology* **2011**, *101*, (6), 732-740.
11. Shores, M.; Yedidia, I.; Chet, I., Involvement of jasmonic acid/ethylene signaling pathway in the systemic resistance induced in cucumber by *Trichoderma asperellum* T203. *Phytopathology* **2005**, *95*, (1), 76-84.
12. Wan, H.; Zhao, Z.; Qian, C.; Sui, Y.; Malik, A. A.; Chen, J., Selection of appropriate reference genes for gene expression studies by quantitative real-time polymerase chain reaction in cucumber. *Anal. Biochem.* **2010**, *399*, (2), 257-261.
